# Supplementary material for: Role of the GLUT1 Glucose Transporter in Postnatal CNS Angiogenesis and Blood-Brain Barrier Integrity
Source: PubMed Central journal article supplement — Circ Res. 2020 May 14;127(4):466–82. doi: 10.1161/CIRCRESAHA.119.316463 (PMC7386868; doi:10.1161/circresaha.119.316463), 2020-05-14

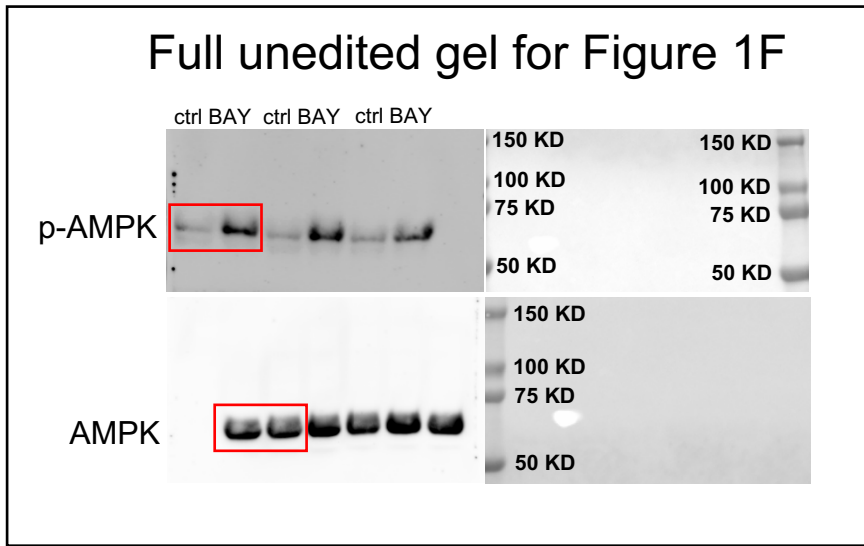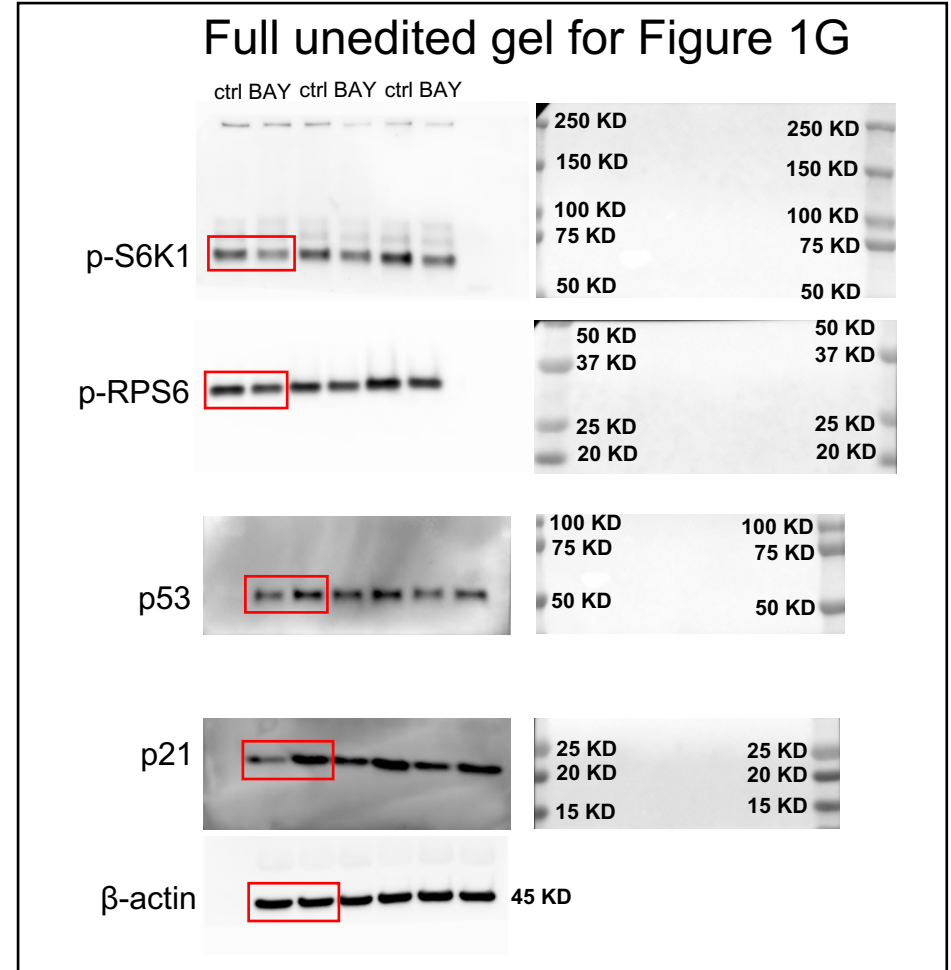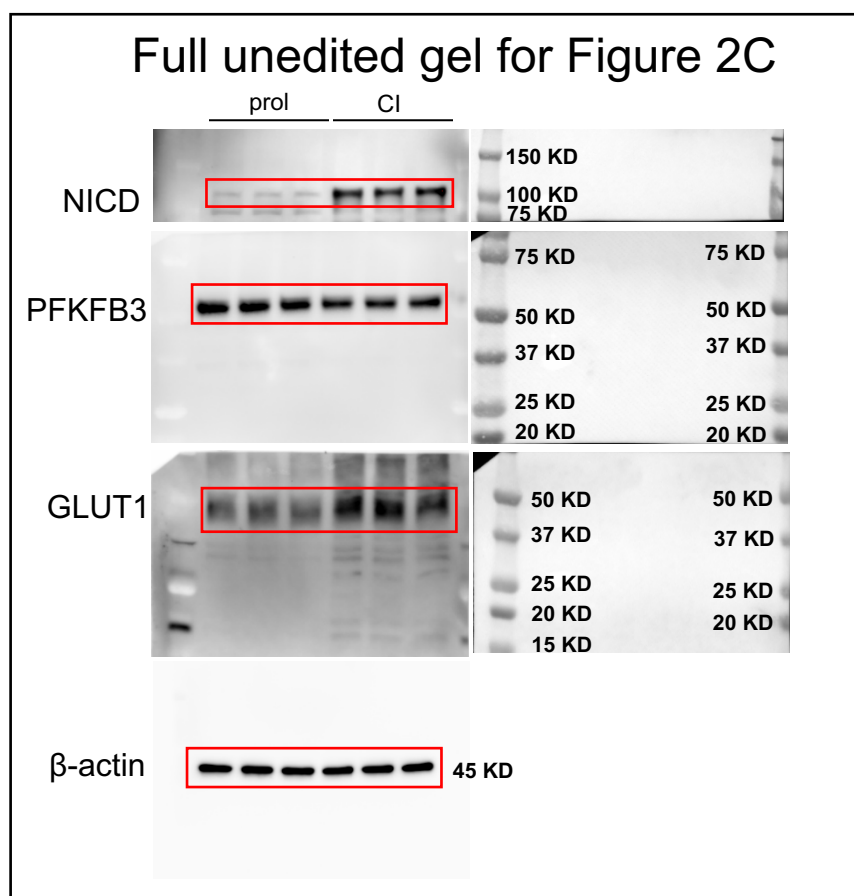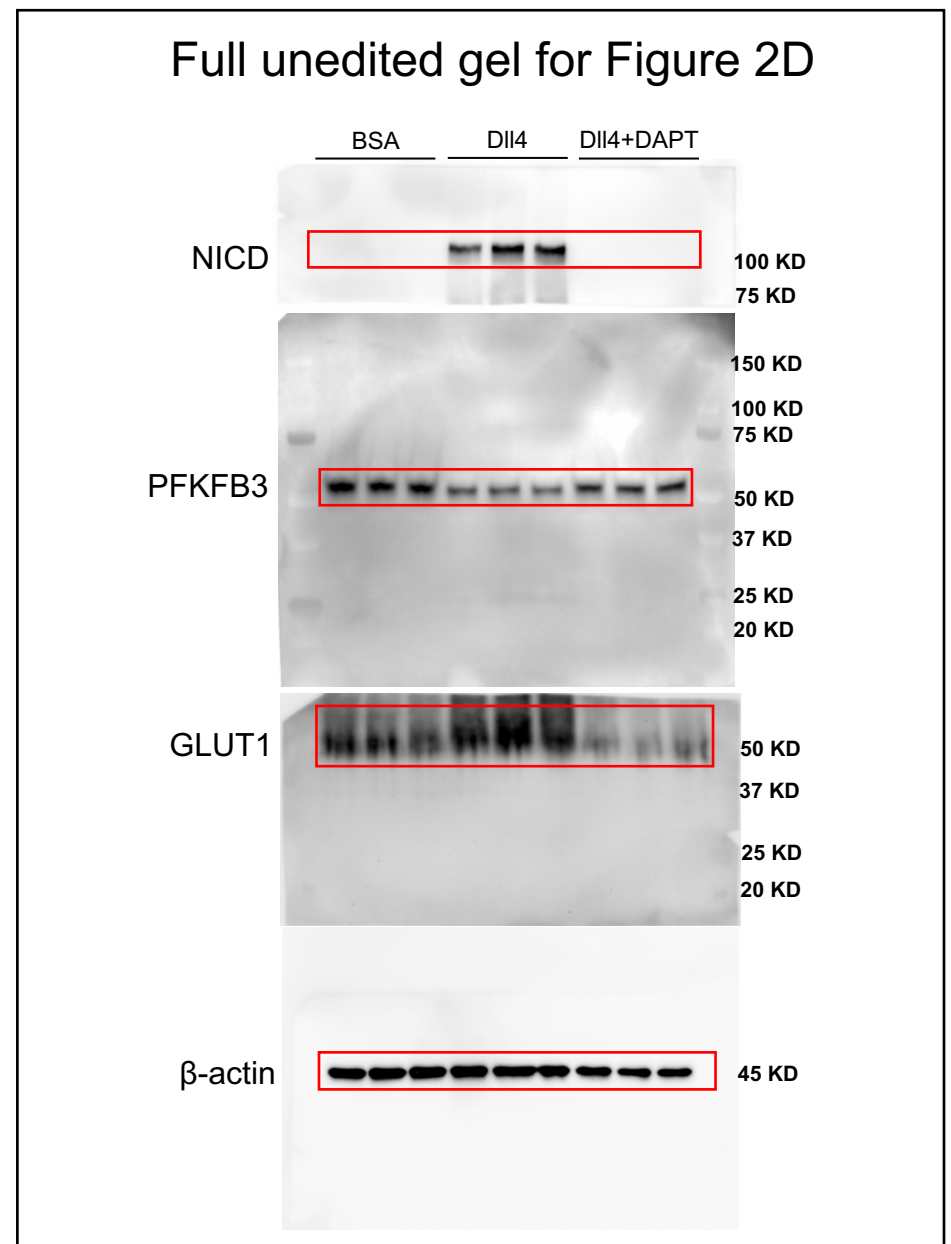

Full unedited gel for Figure 2E

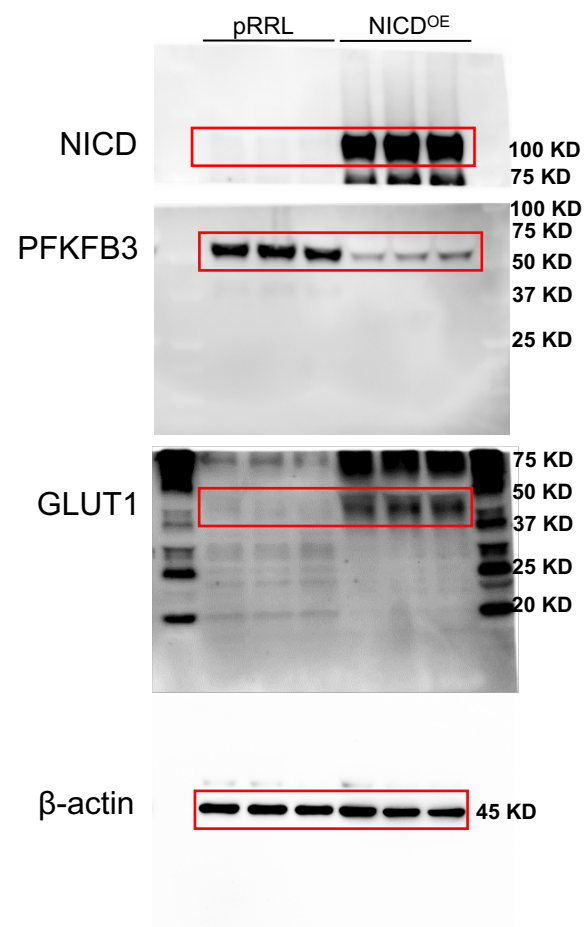

Full unedited gel for Figure 3A

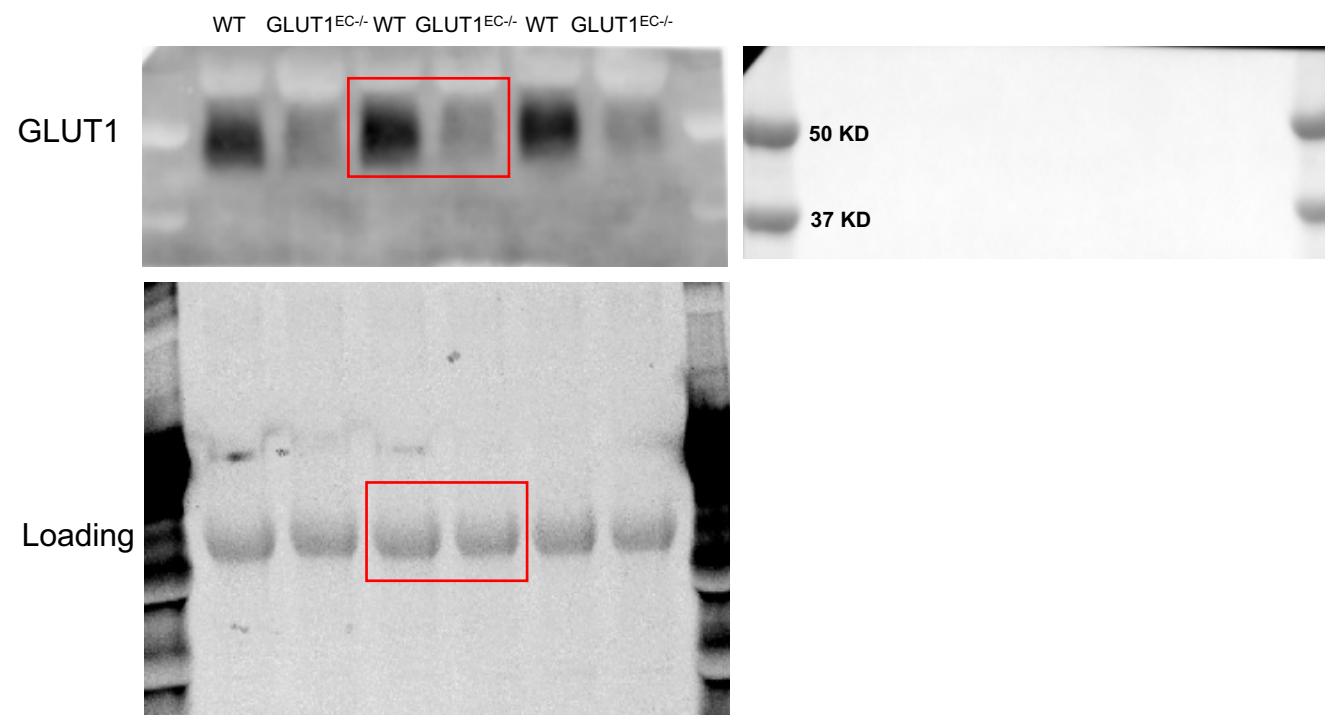

Full unedited gel for Online Fig. III:E

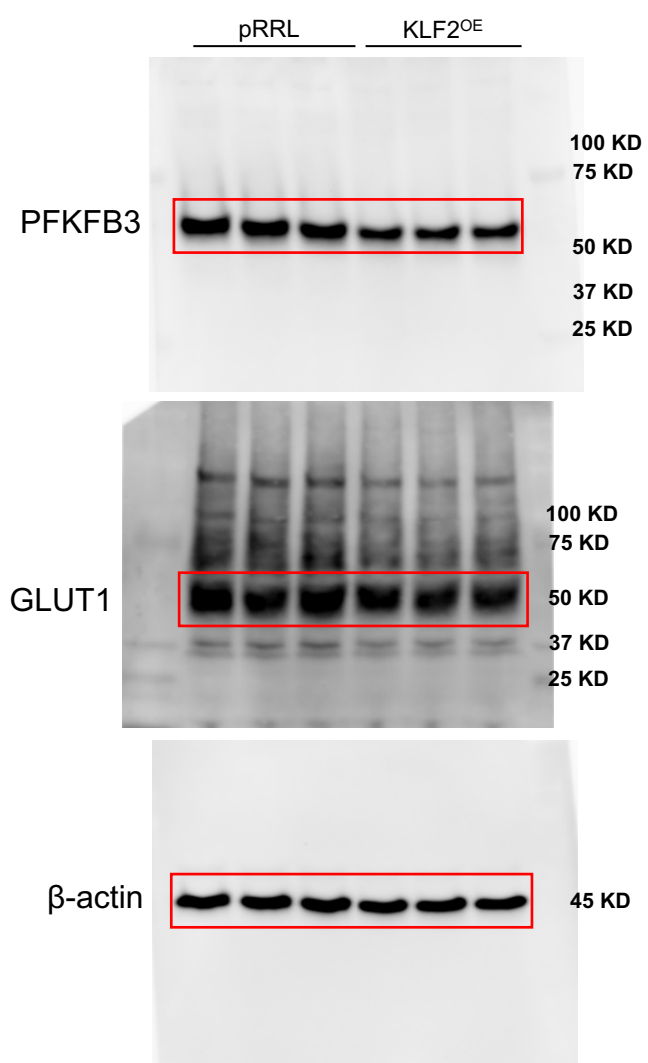

Full unedited gel for Figure 7H

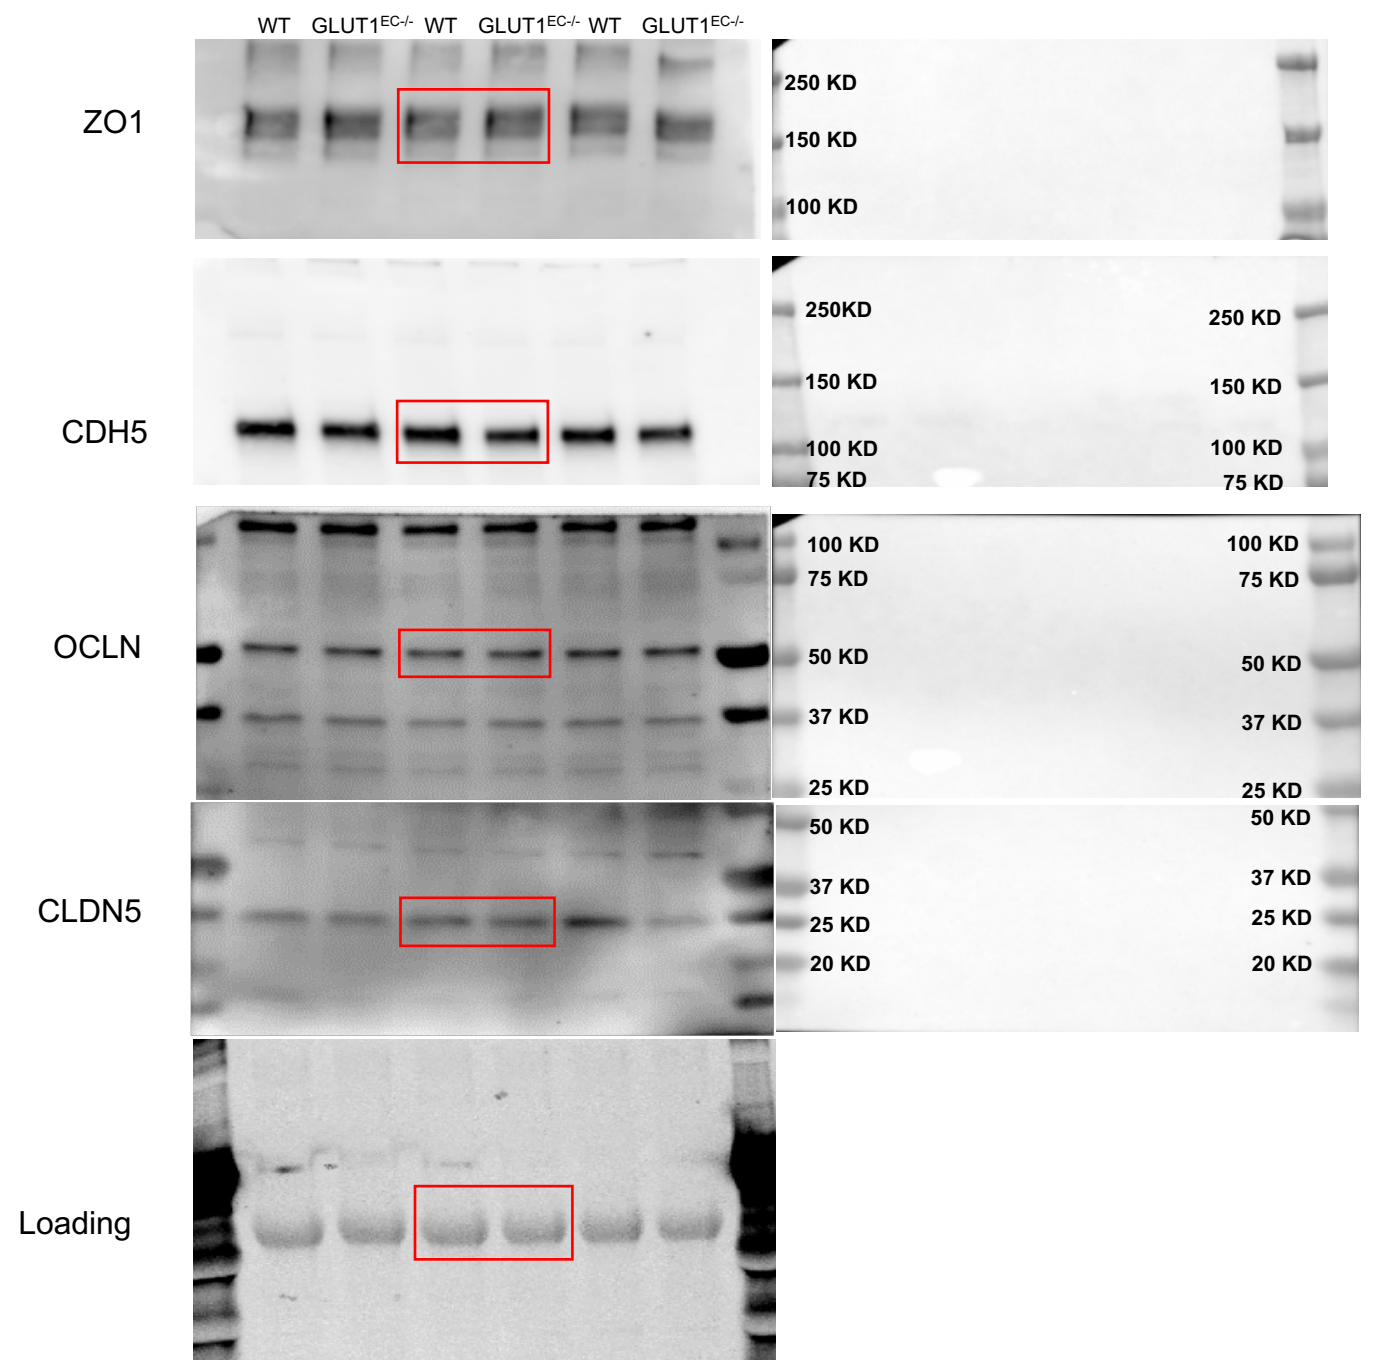

Supplement: res-127-466-s004.pdf [file res-127-466-s004.pdf]
