# Supplementary material for: Role of the GLUT1 Glucose Transporter in Postnatal CNS Angiogenesis and Blood-Brain Barrier Integrity
Source: PubMed Central journal article supplement — Circ Res. 2020 May 14;127(4):466–82. doi: 10.1161/CIRCRESAHA.119.316463 (PMC7386868; doi:10.1161/circresaha.119.316463), 2020-05-14
Supplement: res-127-466-s006.pdf [file res-127-466-s006.pdf]

## Major Resources Table

In order to allow validation and replication of experiments, all essential research materials listed in the Methods should be included in the Major Resources Table below. Authors are encouraged to use public repositories for protocols, data, code, and other materials and provide persistent identifiers and/or links to repositories when available. Authors may add or delete rows as needed.

### Animals (in vivo studies)

| Species      | Vendor or Source | Background Strain | Sex         | Persistent ID / URL |
|--------------|------------------|-------------------|-------------|---------------------|
| C57BL6/N     |                  | C57BL6/N          | Male/female |                     |
| See GMA list |                  |                   |             |                     |

### Genetically Modified Animals

|                        | Species             | Vendor or Source                                                                                                                                  | Background Strain | Other Information         | Persistent ID / URL      |
|------------------------|---------------------|---------------------------------------------------------------------------------------------------------------------------------------------------|-------------------|---------------------------|--------------------------|
| <b>Parent - Male</b>   | <i>Mus musculus</i> | Young CD et al. PLoS One 2011. Modulation of glucose transporter 1 (GLUT1) expression alters mouse mammary tumor cell growth in vitro and in vivo | C57Bl/6           | GLUT1 <sup>lox/lox</sup>  | B6-slc2a1<tm floxed aed> |
| <b>Parent - Female</b> | <i>Mus musculus</i> | Young CD et al. PLoS One 2011. Modulation of glucose transporter 1 (GLUT1) expression alters mouse mammary tumor cell growth in vitro and in vivo | C57Bl/6           | GLUT1 <sup>lox/lox</sup>  | B6-slc2a1<tm floxed aed> |
| <b>Parent - Male</b>   | <i>Mus musculus</i> | Claxton et al., Genesis 2008. Efficient, inducible Cre-recombinase activation in vascular endothelium                                             | C57Bl/6           | Pdgfb-Cre <sup>ERT2</sup> | Tg(Pdgfb-icre/ERT2)1Frut |
| <b>Parent - Female</b> | <i>Mus musculus</i> | Claxton et al., Genesis 2008. Efficient, inducible Cre-recombinase activation in vascular endothelium                                             | C57Bl/6           | Pdgfb-Cre <sup>ERT2</sup> | Tg(Pdgfb-icre/ERT2)1Frut |

## Antibodies

| Target antigen                  | Vendor or Source        | Catalog #  | Working concentration | Lot # (preferred but not required) | Persistent ID / URL                                                                                                                                                                                                                                                                         |
|---------------------------------|-------------------------|------------|-----------------------|------------------------------------|---------------------------------------------------------------------------------------------------------------------------------------------------------------------------------------------------------------------------------------------------------------------------------------------|
| Mouse/Rat CD31/PECAM-1 Antibody | R&D Systems             | AF3628     | 1/200                 |                                    | <a href="https://www.rndsystems.com/products/mouse-rat-cd31-pecam-1-antibody_af3628">https://www.rndsystems.com/products/mouse-rat-cd31-pecam-1-antibody_af3628</a>                                                                                                                         |
| CD31-PE conjugated antibody     | ThermoFisher Scientific | 12-0311-82 | 1/100                 |                                    | <a href="https://www.thermofisher.com/antibody/product/CD31-PECAM-1-Antibody-clone-390-Monoclonal/12-0311-82">https://www.thermofisher.com/antibody/product/CD31-PECAM-1-Antibody-clone-390-Monoclonal/12-0311-82</a>                                                                       |
| CD45-APC conjugated antibody    | BD Biosciences          | 561018     | 1/100                 |                                    | <a href="https://wwwbdbiosciences.com/us/applications/research/stem-cell-research/cancer-research/mouse/apc-rat-anti-mouse-cd45-30-f11/p/561018">https://wwwbdbiosciences.com/us/applications/research/stem-cell-research/cancer-research/mouse/apc-rat-anti-mouse-cd45-30-f11/p/561018</a> |
| GLUT1                           | Abcam                   | ab14683    | 1/1000                |                                    | <a href="https://www.abcam.com/glucose-transporter-glut1-antibody-ab14683.html">https://www.abcam.com/glucose-transporter-glut1-antibody-ab14683.html</a>                                                                                                                                   |
| CDH5                            | Abcam                   | ab33168    | 1/1000                |                                    | <a href="https://www.abcam.com/ve-cadherin-antibody-intercellular-junction-marker-ab33168.html">https://www.abcam.com/ve-cadherin-antibody-intercellular-junction-marker-ab33168.html</a>                                                                                                   |
| OCLN                            | Abcam                   | ab31721    | 1/1000                |                                    | <a href="https://www.abcam.com/occludin-antibody-ab31721.html">https://www.abcam.com/occludin-antibody-ab31721.html</a>                                                                                                                                                                     |

DOI [to be added]

|                                                  |                         |          |        |                                                                                                                                                                                                                                                                                                                                                                                                                 |
|--------------------------------------------------|-------------------------|----------|--------|-----------------------------------------------------------------------------------------------------------------------------------------------------------------------------------------------------------------------------------------------------------------------------------------------------------------------------------------------------------------------------------------------------------------|
| ZO1                                              | ThermoFisher Scientific | 61-7300  | 1/1000 | <a href="https://www.thermofisher.com/antibody/product/ZO-1-Antibody-Polyclonal/61-7300">https://www.thermofisher.com/antibody/product/ZO-1-Antibody-Polyclonal/61-7300</a>                                                                                                                                                                                                                                     |
| CLDN5                                            | Abcam                   | ab15106  | 1/1000 | <a href="https://www.abcam.com/claudin-5-antibody-ab15106.html">https://www.abcam.com/claudin-5-antibody-ab15106.html</a>                                                                                                                                                                                                                                                                                       |
| Phospho-AMPK $\alpha$ (Thr172)                   | Cell signaling          | 2531     | 1/1000 | <a href="https://www.cellsignal.com/products/primary-antibodies/phospho-ampka-thr172-antibody/2531">https://www.cellsignal.com/products/primary-antibodies/phospho-ampka-thr172-antibody/2531</a>                                                                                                                                                                                                               |
| AMPK $\alpha$                                    | Cell signaling          | 2532     | 1/1000 | <a href="https://www.cellsignal.com/products/primary-antibodies/ampka-antibody/2532">https://www.cellsignal.com/products/primary-antibodies/ampka-antibody/2532</a>                                                                                                                                                                                                                                             |
| p53 (1C12)                                       | Cell signaling          | 2524     | 1/1000 | <a href="https://www.cellsignal.com/products/primary-antibodies/p53-1c12-mouse-mab/2524">https://www.cellsignal.com/products/primary-antibodies/p53-1c12-mouse-mab/2524</a>                                                                                                                                                                                                                                     |
| p21                                              | Abcam                   | ab109520 | 1/1000 | <a href="https://www.abcam.com/p21-antibody-epr362-ab109520">https://www.abcam.com/p21-antibody-epr362-ab109520</a>                                                                                                                                                                                                                                                                                             |
| activated Notch1 (NICD)                          | Abcam                   | ab8925   | 1/1000 | <a href="https://www.abcam.com/activated-notch1-antibody-ab8925.html">https://www.abcam.com/activated-notch1-antibody-ab8925.html</a>                                                                                                                                                                                                                                                                           |
| PFKFB3                                           | Abcam                   | ab181861 | 1/1000 | <a href="https://www.abcam.com/pfkfb3-antibody-epr12594-ab181861.html">https://www.abcam.com/pfkfb3-antibody-epr12594-ab181861.html</a>                                                                                                                                                                                                                                                                         |
| $\beta$ -Actin (8H10D10)                         | Cell signaling          | 3700     | 1/1000 | <a href="https://www.cellsignal.com/products/primary-antibodies/b-actin-8h10d10-mouse-mab/3700">https://www.cellsignal.com/products/primary-antibodies/b-actin-8h10d10-mouse-mab/3700</a>                                                                                                                                                                                                                       |
| HRP-M (Anti-mouse IgG, HRP-linked Antibody)      | Cell signaling          | 7076     | 1/2000 | <a href="https://www.cellsignal.com/products/secondary-antibodies/anti-mouse-igg-hrp-linked-antibody/7076">https://www.cellsignal.com/products/secondary-antibodies/anti-mouse-igg-hrp-linked-antibody/7076</a>                                                                                                                                                                                                 |
| HRP-R (Anti-rabbit IgG, HRP-linked Antibody)     | Cell signaling          | 7074     | 1/2000 | <a href="https://www.cellsignal.com/products/secondary-antibodies/anti-rabbit-igg-hrp-linked-antibody/7074?N=4294956287&amp;Ntt=7074v&amp;requestid=401748&amp;fromPage=plp&amp;site-search-type=Products">https://www.cellsignal.com/products/secondary-antibodies/anti-rabbit-igg-hrp-linked-antibody/7074?N=4294956287&amp;Ntt=7074v&amp;requestid=401748&amp;fromPage=plp&amp;site-search-type=Products</a> |
| Mannose Receptor antibody [MR5D3]                | GeneTex                 | GTX42263 | 1/100  | <a href="https://www.genetex.com/Product/Detail/Mannose-Receptor-antibody-MR5D3/GTX42263">https://www.genetex.com/Product/Detail/Mannose-Receptor-antibody-MR5D3/GTX42263</a>                                                                                                                                                                                                                                   |
| Mouse Podocalyxin Antibody                       | R&D Systems             | AF1556   | 1/300  | <a href="https://www.rndsystems.com/products/mouse-podocalyxin-antibody_af1556">https://www.rndsystems.com/products/mouse-podocalyxin-antibody_af1556</a>                                                                                                                                                                                                                                                       |
| ERG (A7L1G)                                      | Cell signaling          | 97249    | 1/200  | <a href="https://www.cellsignal.com/products/primary-antibodies/erg-a7l1g-rabbit-mab/97249">https://www.cellsignal.com/products/primary-antibodies/erg-a7l1g-rabbit-mab/97249</a>                                                                                                                                                                                                                               |
| CLDN5 (anti-mouse Alexa-488-conjugated antibody) | ThermoFisher Scientific | 352588   | 1/50   | <a href="https://www.thermofisher.com/antibody/product/Claudin-5-Antibody-clone-4C3C2-Monoclonal/352588">https://www.thermofisher.com/antibody/product/Claudin-5-Antibody-clone-4C3C2-Monoclonal/352588</a>                                                                                                                                                                                                     |
| CD105/Endoglin (anti-rat antibody)               | Merck                   | CBL1358  | 1/100  | <a href="https://www.merckmillipore.com/BE/en/product/Anti-Endoglin-Antibody-Extracellular-clone-MJ7-18,MM_NF-CBL1358">https://www.merckmillipore.com/BE/en/product/Anti-Endoglin-Antibody-Extracellular-clone-MJ7-18,MM_NF-CBL1358</a>                                                                                                                                                                         |

## Chemicals

| Name                                                                 | Vendor or Source | Catalog # | Working concentration | Persistent ID / URL                                                                                                                                                         |
|----------------------------------------------------------------------|------------------|-----------|-----------------------|-----------------------------------------------------------------------------------------------------------------------------------------------------------------------------|
| 4',6-Diamidino-2-phenylindole dihydrochloride (DAPI dihydrochloride) | Sigma-Aldrich    | D9542     | 1:10000               | <a href="https://www.sigmaaldrich.com/catalog/product/sigma/d9542?lang=de&amp;region=CH">https://www.sigmaaldrich.com/catalog/product/sigma/d9542?lang=de&amp;region=CH</a> |

## Cultured Cells

| Name                                            | Vendor or Source       | Catalog # | Sex (F, M, or unknown) | Persistent ID / URL                                                                                                                                                                                                                                                                                                                                |
|-------------------------------------------------|------------------------|-----------|------------------------|----------------------------------------------------------------------------------------------------------------------------------------------------------------------------------------------------------------------------------------------------------------------------------------------------------------------------------------------------|
| bEnd.3 [BEND3]                                  | ATCC , France          | CRL2299™  | unknown                | bEnd.3 [BEND3]<br><a href="https://www.lgcstandards-atcc.org/Products/All/CRL-2299.aspx?geo_country=ch">https://www.lgcstandards-atcc.org/Products/All/CRL-2299.aspx?geo_country=ch</a>                                                                                                                                                            |
| Human retinal microvascular endothelial cells   | Cell Systems           | ACBRI 181 | unknown                | Primary Human Retinal Microvascular Endothelial Cells<br><a href="https://cell-systems.com/collections/all/products/primary-human-retinal-microvascular-endothelial-cells-acbri-181?variant=37741819851">https://cell-systems.com/collections/all/products/primary-human-retinal-microvascular-endothelial-cells-acbri-181?variant=37741819851</a> |
| human brain microvascular (HBMV) ECs            | ScienCell, Switzerland | 1000      | unknown                | Human Brain Microvascular Endothelial Cells(HBMEC)<br><a href="https://www.sciencellonline.com/PS/1000.pdf">https://www.sciencellonline.com/PS/1000.pdf</a>                                                                                                                                                                                        |
| Human Umbilical Vein Endothelial Cells (HUVECS) | Sigma                  | 200P-05N  | unknown                | <a href="https://www.sigmaaldrich.com/catalog/product/sigma/200p05n?lang=de&amp;region=CH">https://www.sigmaaldrich.com/catalog/product/sigma/200p05n?lang=de&amp;region=CH</a>                                                                                                                                                                    |

## Data & Code Availability

| Description | Source / Repository     | Persistent ID / URL                                                                                                                     |
|-------------|-------------------------|-----------------------------------------------------------------------------------------------------------------------------------------|
| GSE141924   | Gene Expression Omnibus | <a href="https://www.ncbi.nlm.nih.gov/geo/query/acc.cgi?acc=GSE141924">https://www.ncbi.nlm.nih.gov/geo/query/acc.cgi?acc=GSE141924</a> |
| GSE141923   | Gene Expression Omnibus | <a href="https://www.ncbi.nlm.nih.gov/geo/query/acc.cgi?acc=GSE141923">https://www.ncbi.nlm.nih.gov/geo/query/acc.cgi?acc=GSE141923</a> |
